# Supplementary material for: Integrated multi-omics analysis and machine learning identify hub genes and potential mechanisms of resistance to immunotherapy in gastric cancer
Source: publisher site journal article supplement (doi:10.18632/aging.205760), 2024-04-22
Supplement: Supplementary file [file aging-v16i8-205760-supplementary-material-SD1.pdf]

# SUPPLEMENTARY FIGURES

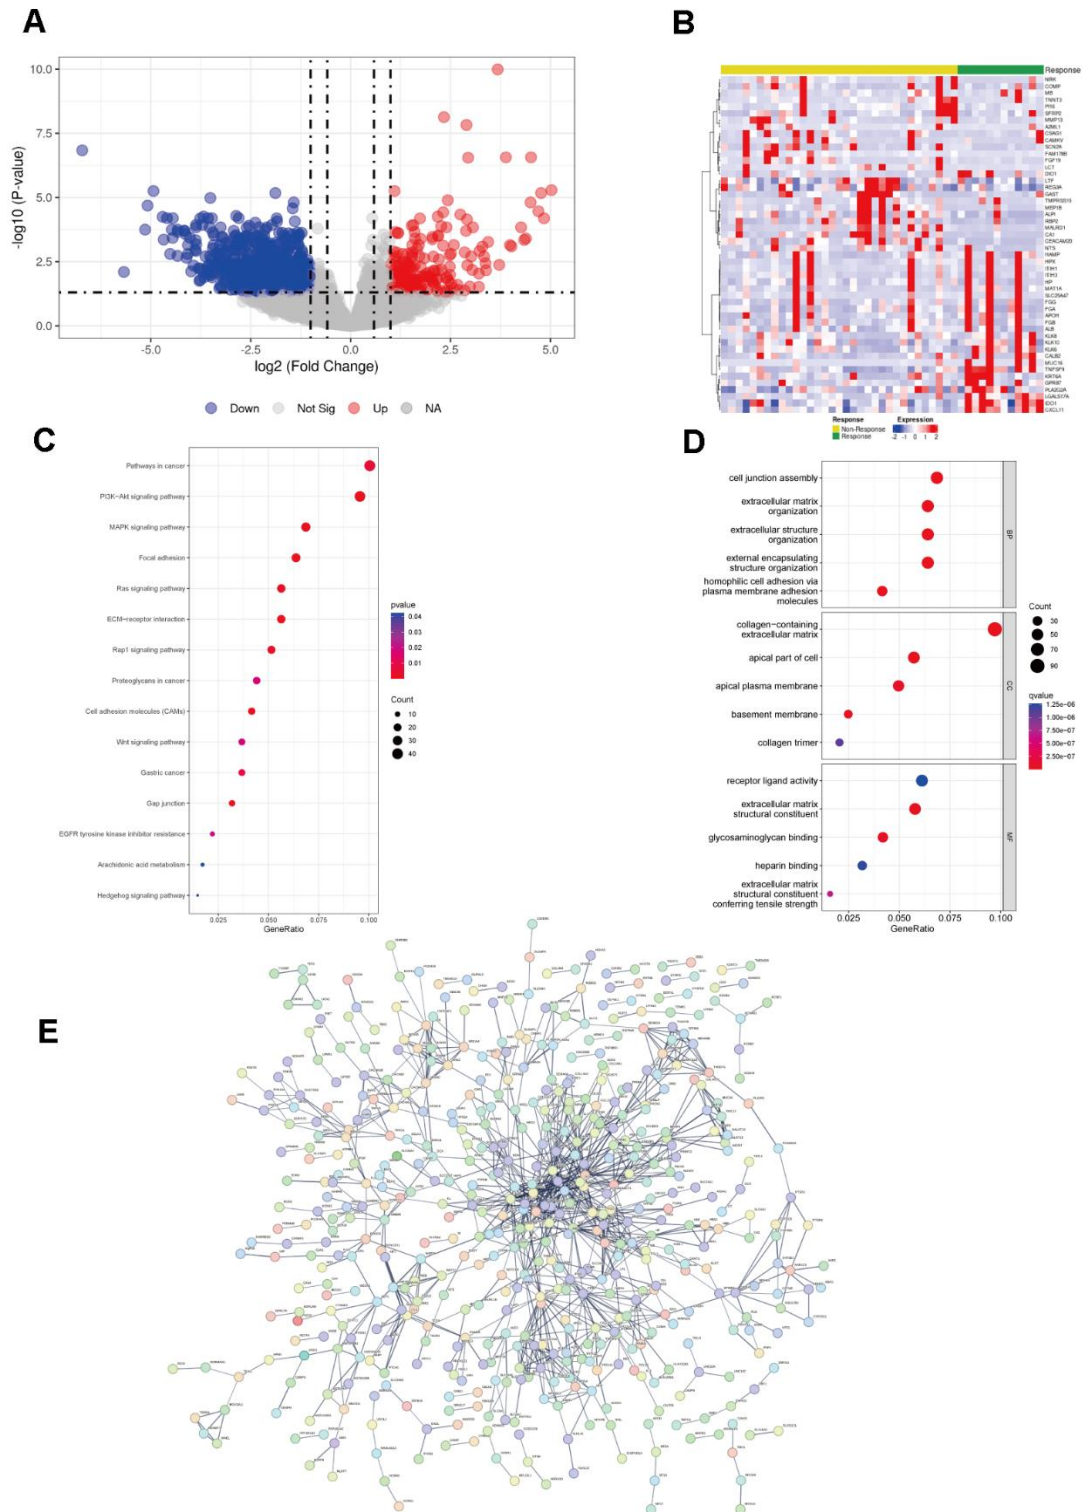

**Supplementary Figure 1. Identification of differentially expressed genes (DEGs) associated with immunotherapy. (A)** Volcano plot of DEGs. **(B)** Heatmap of DEGs. **(C)** KEGG analysis of DEGs. **(D)** GO analysis of DEGs. **(E)** PPI of DEGs.

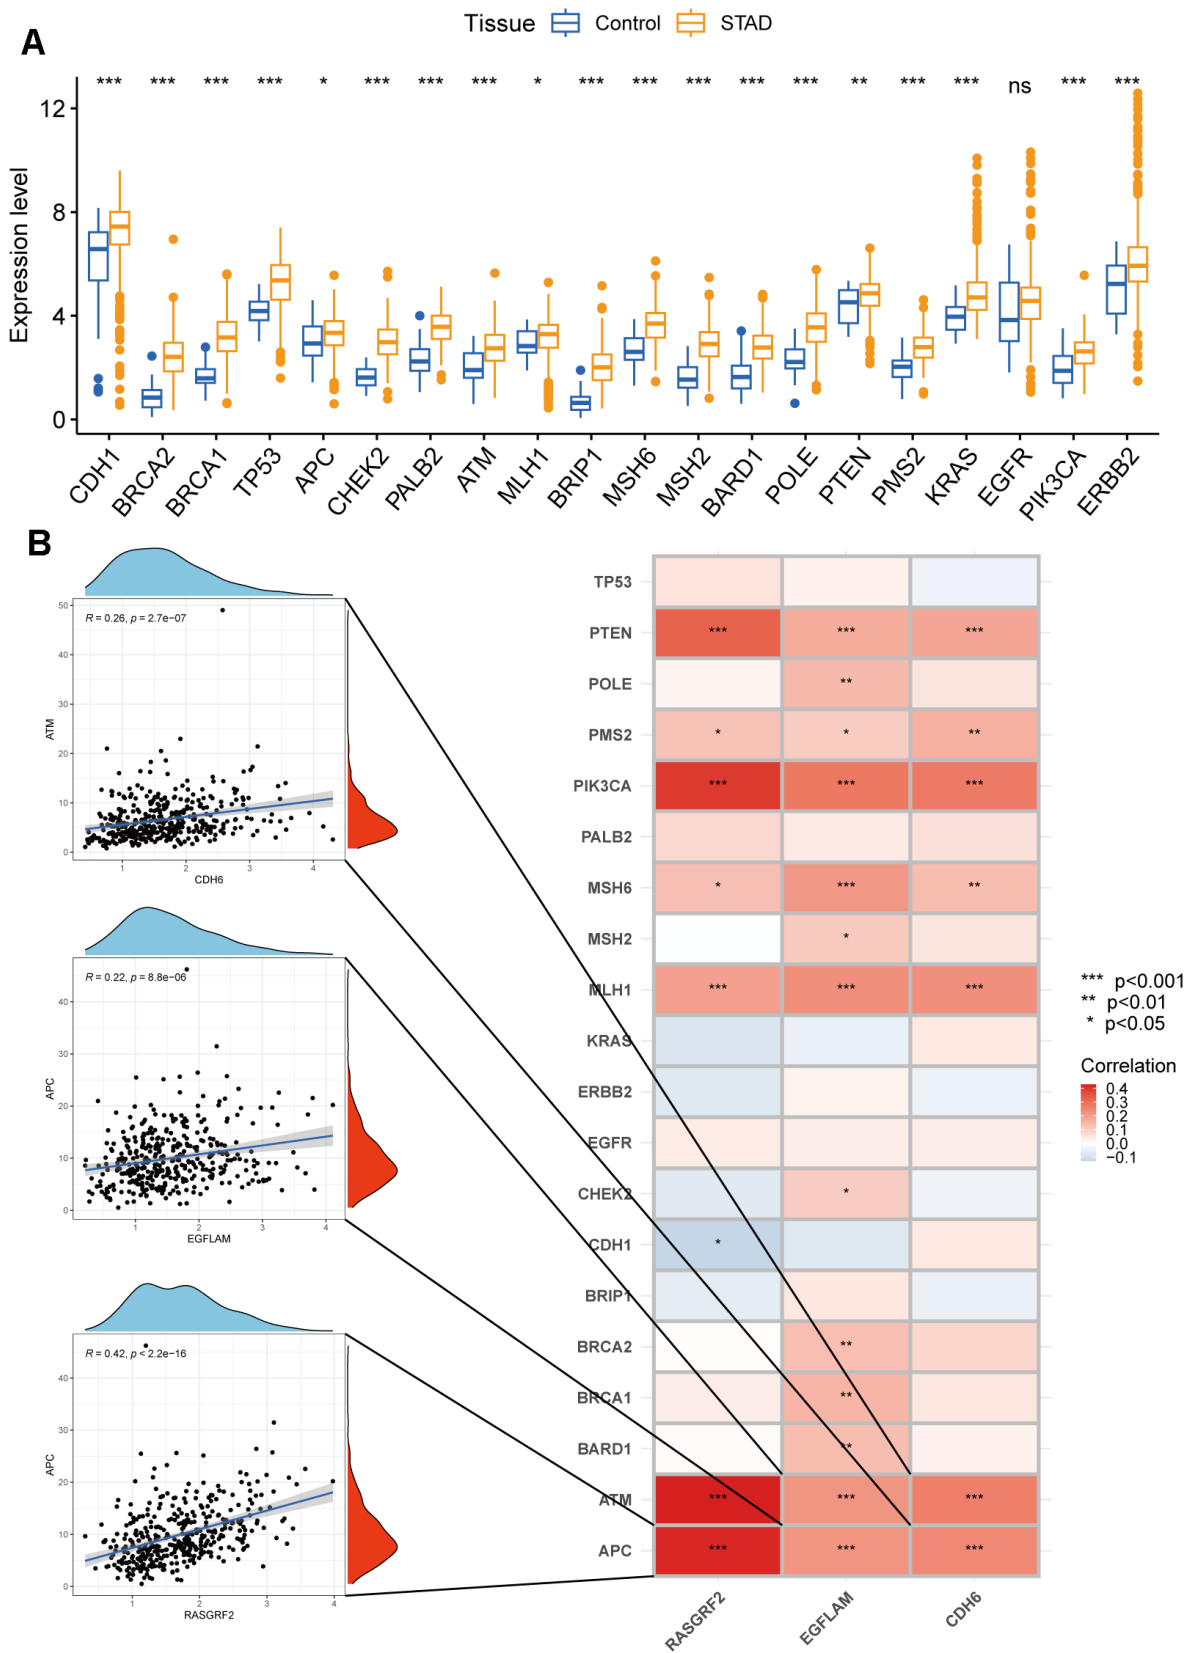

**Supplementary Figure 2. Exploration of interrelationships between hub genes and disease-related genes.** (A) Comparison of disease-related genes in normal and tumor tissues. (B) Pearson correlation analysis of hub genes and disease-associated genes. \*p < 0.05, \*\*p < 0.01, \*\*\*p < 0.001.

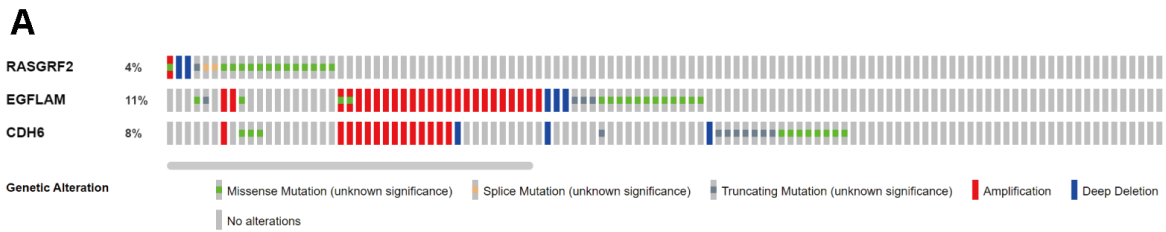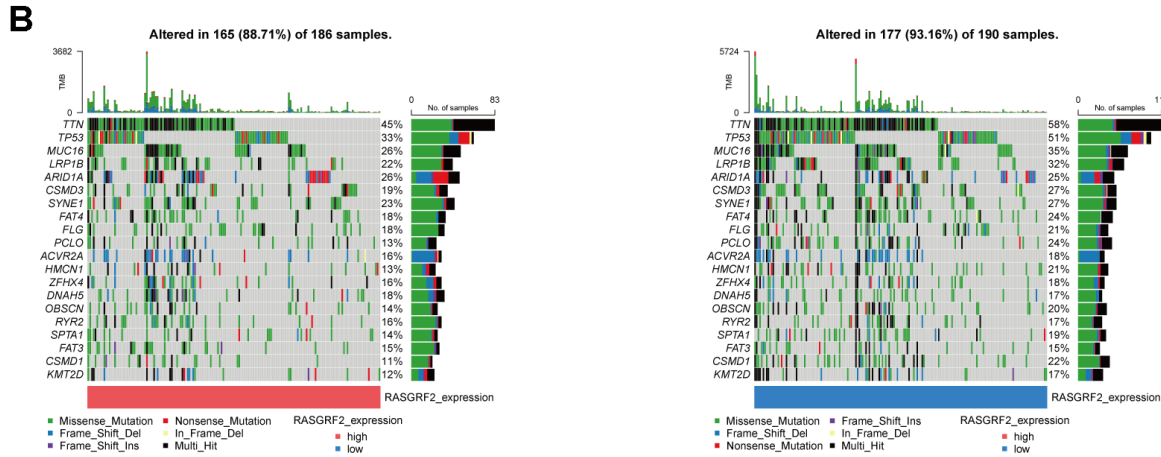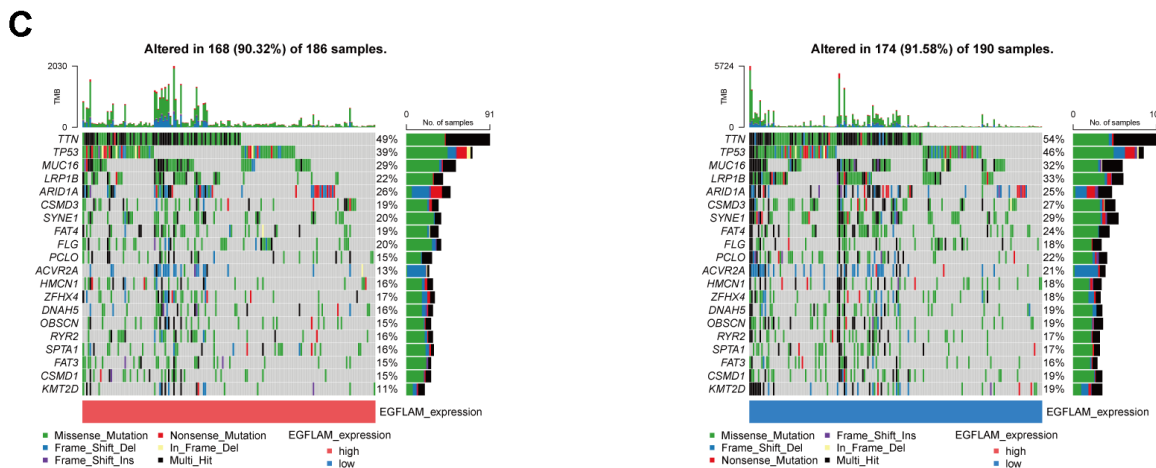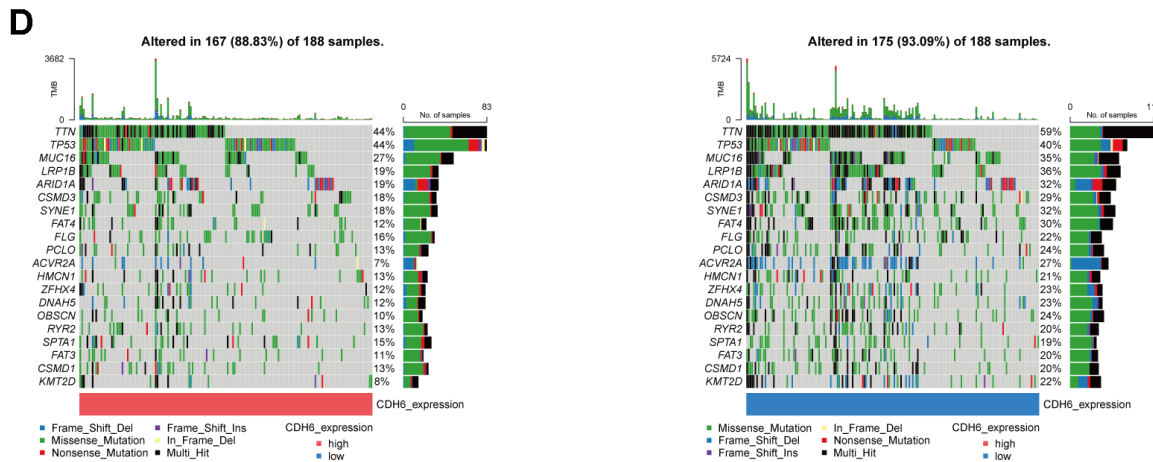

**Supplementary Figure 3. Mutation analysis of the hub genes.** (A) Analysis of genetic variation in the hub genes of the TCGA\_STAD cohort. (B–D) Mutational analysis of somatic cells with different RASGRF2, EGFLAM, and CDH6 expressions.

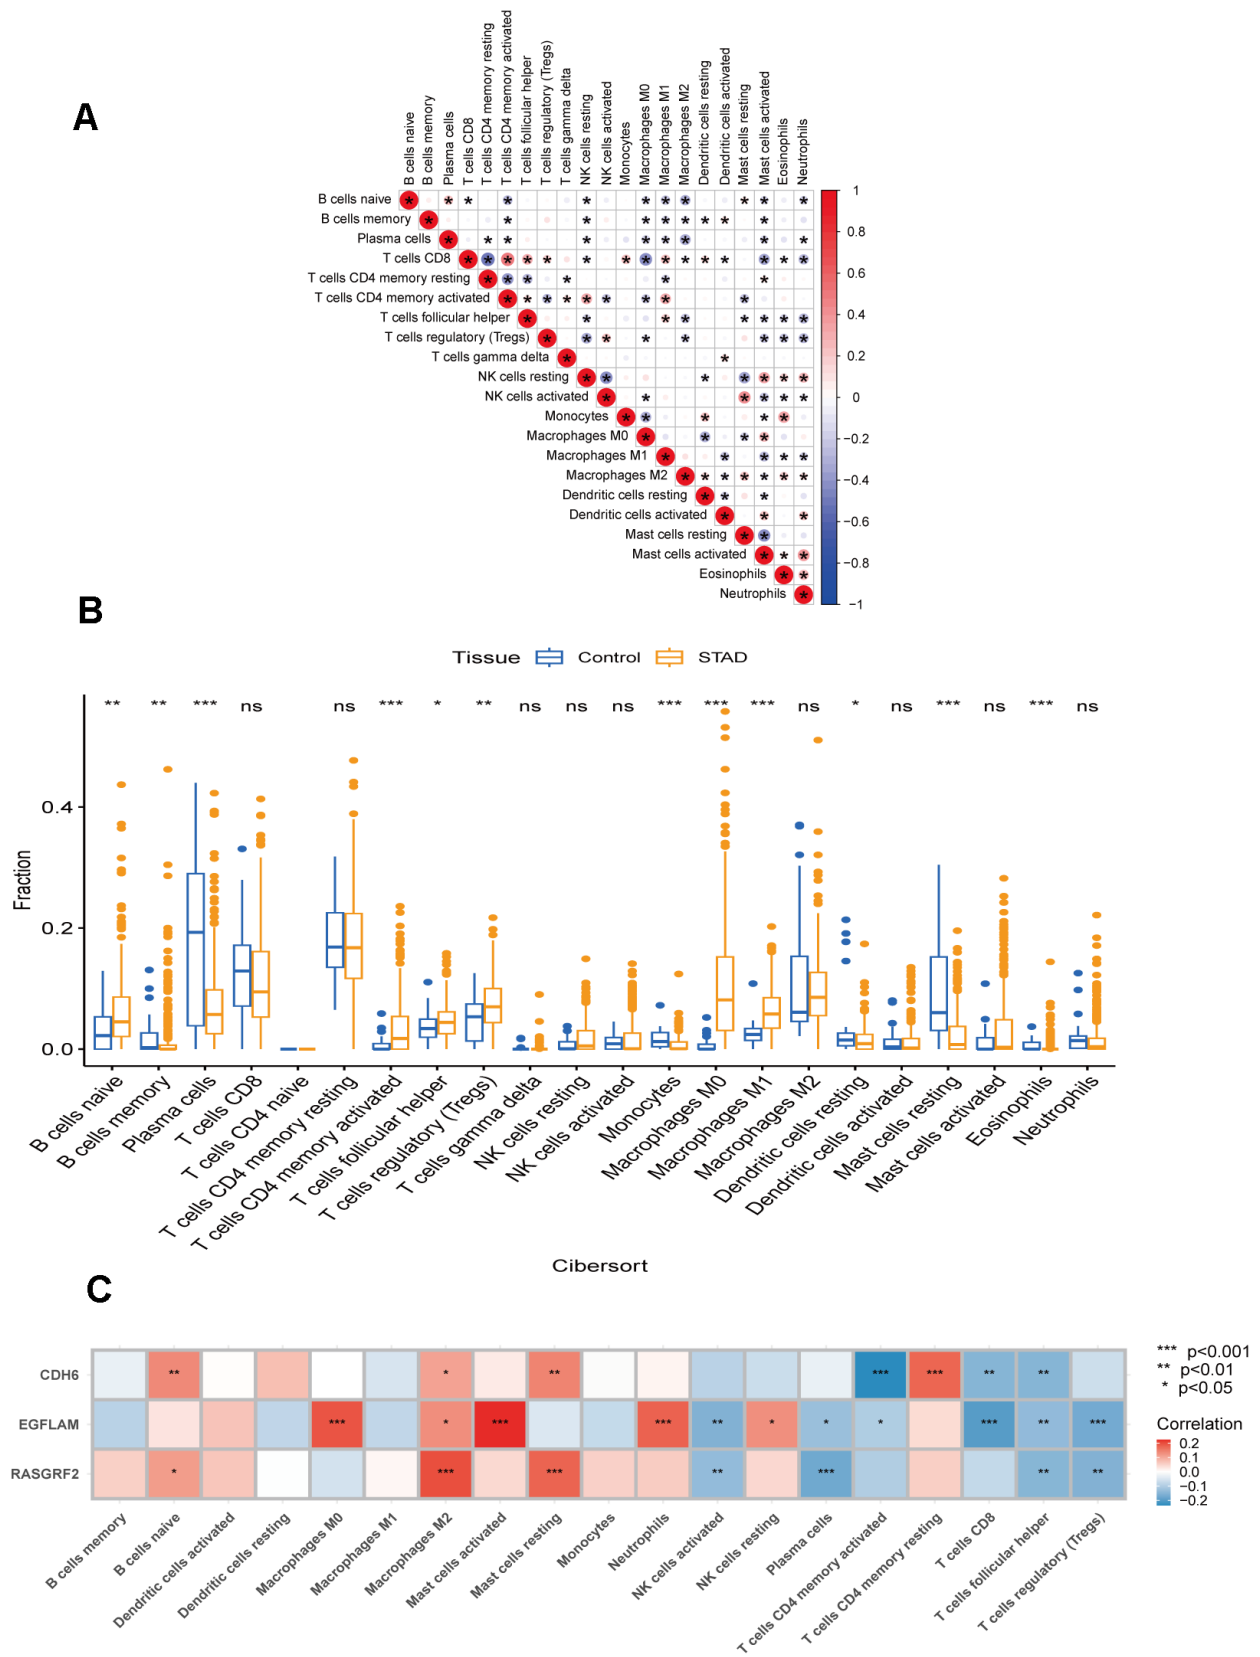

**Supplementary Figure 4. Analysis of Pearson correlation between hub genes and immune cells.** (A) Correlation analysis of 22 immune cells in STAD patients. (B) Comparison of 22 immune cells in normal and tumor tissues. (C) Analysis of hub genes correlation with 22 types of immune cells. \* $p < 0.05$ , \*\* $p < 0.01$ , \*\*\* $p < 0.001$ .

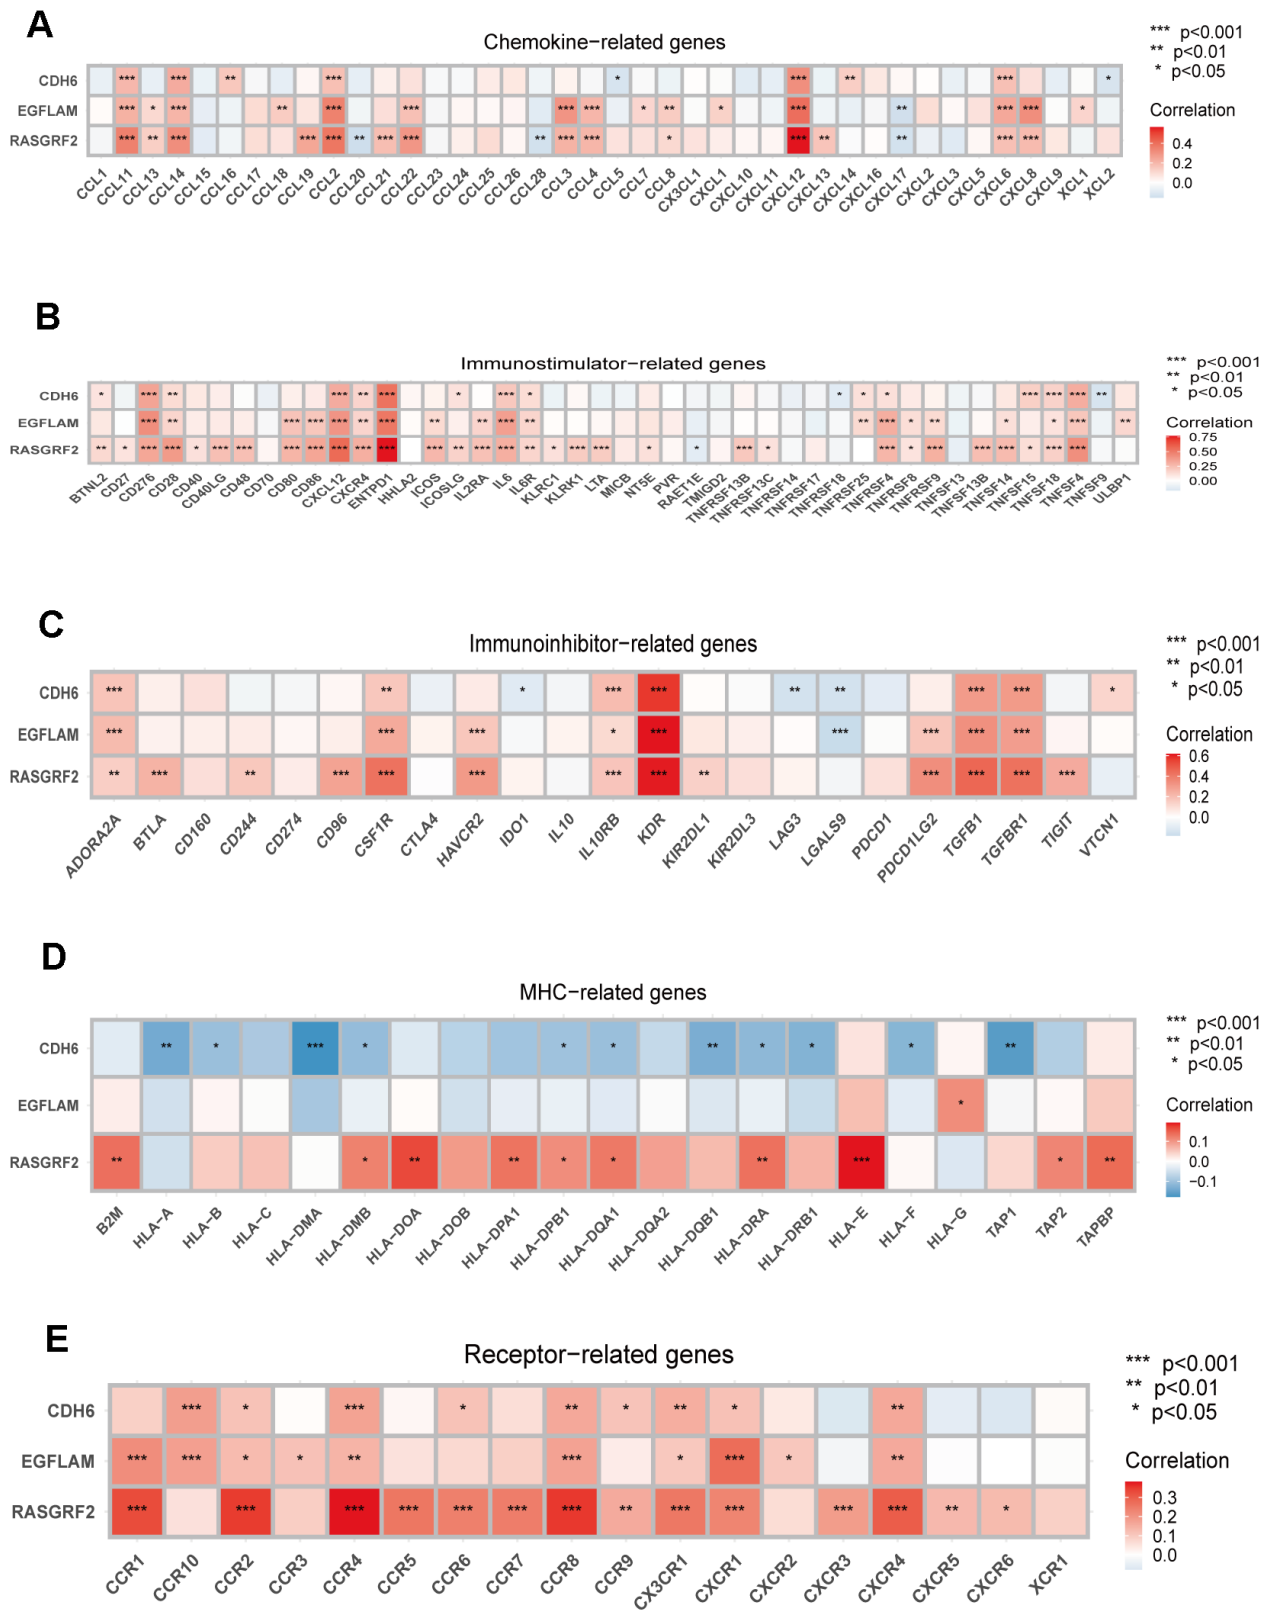

**Supplementary Figure 5. Pearson correlation analysis of hub genes with immune-related genes. (A) Chemokine-related genes. (B) Immunostimulator-related genes. (C) Immunoinhibitor-related genes. (D) MHC-related genes. (E) Receptor-related genes. \*p < 0.05, \*\*p < 0.01, \*\*\*p < 0.001.**

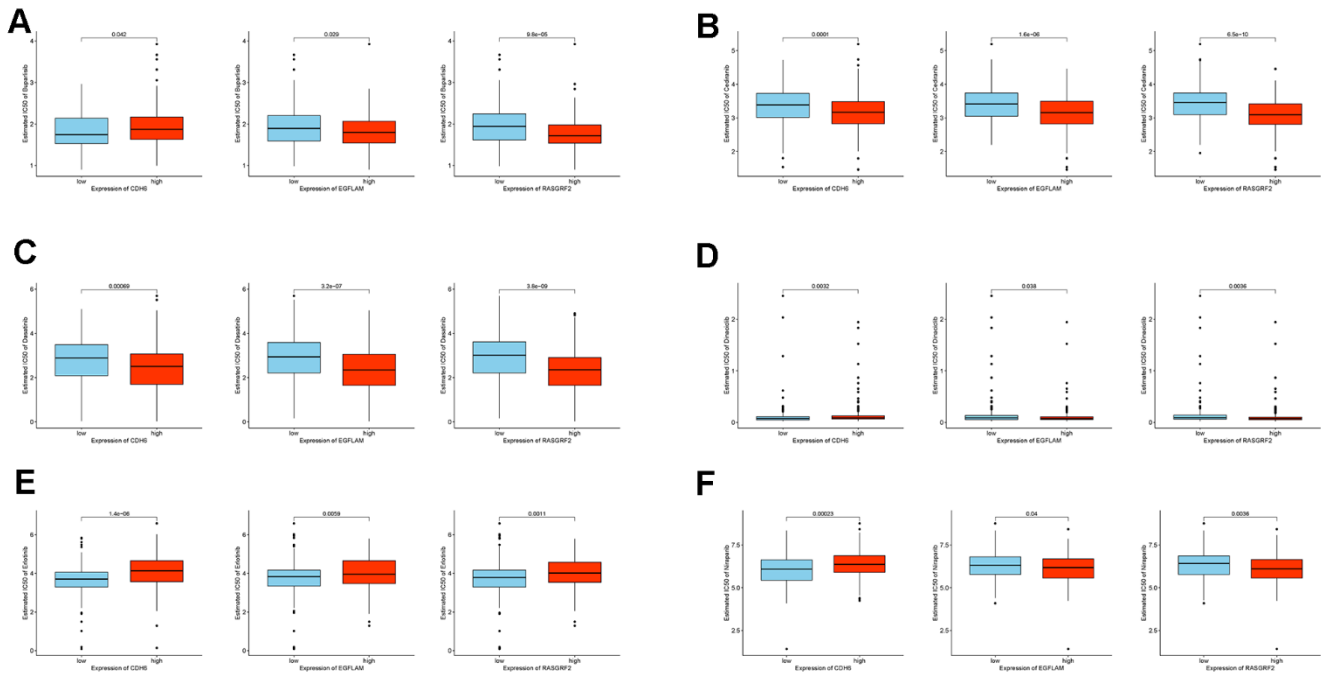

**Supplementary Figure 6. Drug sensitivity analysis of the hub genes. (A) Buparlisib. (B) Cediranib. (C) Dasatinib. (D) Dinaciclib. (E) Erlotinib. (F) Niraparib.**

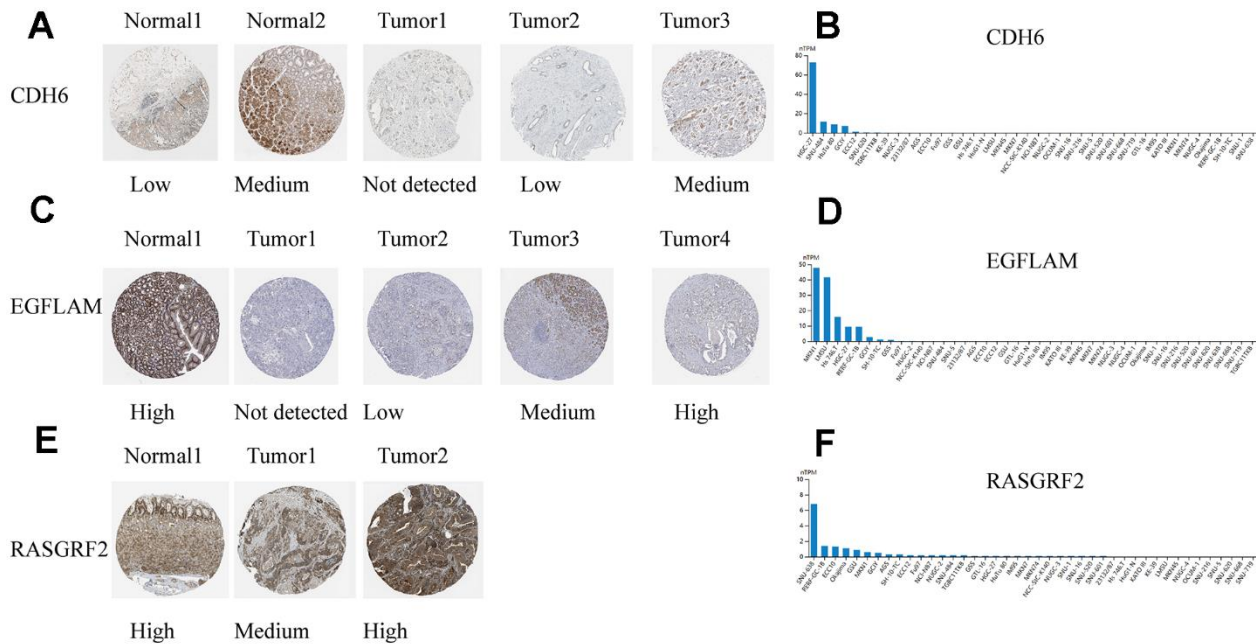

**Supplementary Figure 7. Validation of hub genes expression levels. (A) Validation of protein expression levels of CDH6 in the HPA database. (B) Validation of CDH6 expression levels in gastric cancer cell lines using the CCLE database. (C) Validation of protein expression levels of EGFLAM in the HPA database. (D) Validation of EGFLAM expression levels in gastric cancer cell lines using the CCLE database. (E) Validation of protein expression levels of RASGRF2 in the HPA database. (F) Validation of RASGRF2 expression levels in gastric cancer cell lines using the CCLE database.**

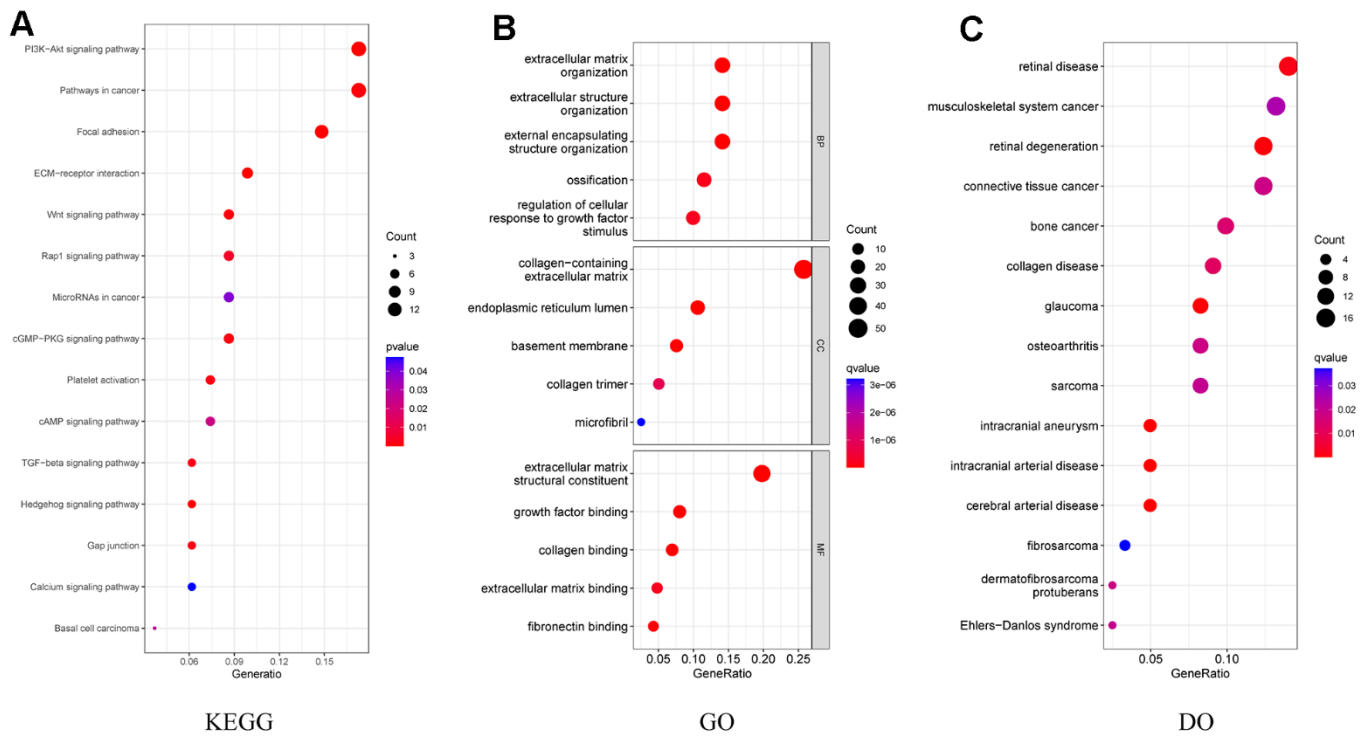

**Supplementary Figure 8. Enrichment analysis of CAFs-related genes.** (A) KEGG analysis of CAFs-related genes. (B) GO analysis of CAFs-related genes. (C) DO analysis of CAFs-related genes.
